# Supplementary material for: Sustained Virologic Suppression Reduces HIV-1 DNA Proviral Levels and HIV Antibodies in Perinatally HIV-Infected Children Followed from Birth
Source: MDPI journal article supplement (doi:10.3390/v14112350), 2022-10-26
Supplement: s1 [file s1]

**Table S1.** Baseline sociodemographic, immunological, and virologic characteristics of children living with HIV in Brazil (N = 37).

|                                                                 | <b>Median</b>   | <b>IQR</b>  |
|-----------------------------------------------------------------|-----------------|-------------|
| Age in months at recruitment for follow-up study (N = 37)       | 101             | 85–112      |
| Age at cART initiation (months) (N = 37)                        | 8               | Range: 0–76 |
| Gestational age at delivery (weeks) (N = 37)                    | 39              | 38–40       |
| Log <sub>10</sub> HIV RNA copies/mL at 6 months of age (N = 37) | 5.59            | 4.96–5.82   |
| CD4+ T cell count at delivery (N = 35)                          | 1978            | 1256–2206   |
| CD8+ T cell count at delivery (N = 35)                          | 1108            | 764–1397    |
|                                                                 | <b><i>n</i></b> | <b>%</b>    |
| Sex                                                             |                 |             |
| Male                                                            | 17              | 45.9%       |
| Female                                                          | 20              | 54.1%       |
| Race/Ethnicity                                                  |                 |             |
| Black                                                           | 13              | 35.1%       |
| Mixed                                                           | 15              | 40.5%       |
| White                                                           | 9               | 24.3%       |
| HIV Infection                                                   |                 |             |
| In utero                                                        | 23              | 62.2%       |
| Intrapartum                                                     | 14              | 37.8%       |
|                                                                 | <b><i>n</i></b> | <b>%</b>    |
| Mode of Delivery                                                |                 |             |
| Cesarean                                                        | 16              | 43.2%       |
| Vaginal                                                         | 21              | 56.8%       |
| Co-infections at birth                                          |                 |             |
| Infant VDRL + at delivery                                       | 17              | 45.9%       |
| Infant CMV + at delivery                                        | 10              | 27.0%       |
| Mother CT + at delivery                                         | 13              | 35.1%       |
| Mother NG + at delivery                                         | 9               | 24.3%       |
| HPTN NICHD 040 study arm:                                       |                 |             |
| ZDV                                                             | 19              | 51.4%       |
| ZDV + NVP                                                       | 8               | 21.6%       |
| ZDV + 3TC + NFV                                                 | 10              | 27.0%       |

VDRL: Venereal Disease Research Laboratory, CMV: Cytomegalovirus, CT/ NG: Chlamydia trachomatis and Neisseria gonorrhea, ZDV: Zidovudine, 3TC: Lamivudine, NFV: Nelfinavir; NVP: Nevirapine.

**Table S2.** Mode of perinatal HIV acquisition, virologic and immunological outcomes, and neonatal prophylaxis regimen by timing of cART initiation among the study participants (N = 37).

|                                                      | <b>Timing of cART Initiation</b> |                    |
|------------------------------------------------------|----------------------------------|--------------------|
|                                                      | Early (N = 13)                   | Late (N = 24)      |
| <b>Mode of perinatal HIV acquisition</b>             |                                  |                    |
| <i>In utero</i>                                      | 12 (92.3%)                       | 11 (45.8%)         |
| <i>Intrapartum</i>                                   | 1 (7.7%)                         | 13 (54.2%)         |
| <b>Neonatal prophylaxis regimen</b>                  |                                  |                    |
| ZDV, N(%)                                            | 5 (38.5%)                        | 14 (58.3%)         |
| ZDV + NVP, N(%)                                      | 5 (38.5%)                        | 3 (12.5%)          |
| ZDV + 3TC + NFV, N(%)                                | 3 (23.1%)                        | 7 (29.2%)          |
| <b>Virologic and immunological endpoints</b>         |                                  |                    |
| Median log10 HIV RNA copies/mL at 6 months           | 5.4 (3.3–5.8)                    | 5.5 (4.8–5.8)      |
| Median ddPCR at 6 months of age (IQR), N = 32        | 3931 (3268–10,695)               | 9084 (4070–15,363) |
| Median ddPCR at 6–11 years of age (IQR), N = 35      | 105 (57–429)                     | 193 (86–553)       |
| Indeterminate/negative WB at 6–11 years of age, N(%) | 3 (23.1%)                        | 5 (20.8%)          |

IQR = interquartile range. Early refers to cART initiation up to 6 months of age, and late after 6 months.

**Table S3.** Mode of perinatal HIV acquisition, virologic and immunological endpoints, timing of treatment initiation, and neonatal prophylaxis regimen by response to cART among the study participants (N = 37).

|                                                | Response to cART   |                    |                        |
|------------------------------------------------|--------------------|--------------------|------------------------|
|                                                | Responder(N = 15)  | Partial (N = 8)    | Non-responder (N = 14) |
| Mode of perinatal HIV acquisition              |                    |                    |                        |
| In utero                                       | 7 (46.7%)          | 7 (87.5%)          | 9 (64.3%)              |
| Intrapartum                                    | 8 (53.3%)          | 1 (12.5%)          | 5 (35.7%)              |
| Neonatal prophylaxis regimen                   |                    |                    |                        |
| ZDV                                            | 11 (73.3%)         | 2 (25%)            | 6 (42.9%)              |
| ZDV + NVP                                      | 2 (13.3%)          | 1 (12.5%)          | 5 (35.7%)              |
| ZDV + 3TC + NFV                                | 2 (13.3%)          | 5 (62.5%)          | 3 (21.4%)              |
| Timing of cART initiation                      |                    |                    |                        |
| Early treatment                                | 3 (20%)            | 4 (50%)            | 6 (42.9%)              |
| Late treatment                                 | 12 (80%)           | 4 (50%)            | 8 (57.1%)              |
| Virologic and immunological endpoints          |                    |                    |                        |
| Median HIV RNA VL at 6 months of age           | 5.4 (3.6–6)        | 5.7 (5.4–5.8)      | 5.3 (3.4–5.8)          |
| Median ddPCR at 6 months of age, N = 32        | 7880 (3938–14,764) | 8586 (3584–11,920) | 7278 (3584–11,920)     |
| Median ddPCR at 6–11 years of age, N = 35      | 144 (85–410)       | 92 (65–348)        | 358 (59–786)           |
| Indeterminate/negative WB at 6–11 years of age | 5 (33.3%)          | 3 (37.5%)          | 0 (0%)                 |

Early refers to cART initiation up to 6 months of age, and late after 6 months.

**Table S4.** Lifetime ART regimens for study participants (N = 37). Switching to a second-line regimen is defined as changing at least one NRTI and changing the backbone drug class or changing the protease inhibitor.

| Patient | Regimen       | Age at First Treatment Initiation (months) | Start Date       | Switched to Second-Line Regimen? <sup>1</sup> |
|---------|---------------|--------------------------------------------|------------------|-----------------------------------------------|
| 1       | D4T,3TC,LOP/r | 13                                         | 17 October 2006  |                                               |
|         | AZT,3TC,LOP/r |                                            | 30 March 2010    |                                               |
| 2       | AZT,3TC,NVP   | 4                                          | 5 March 2009     | Y                                             |
|         | AZT,3TC,LOP/r |                                            | 18 March 2009    |                                               |
|         | AZT,3TC,EFV   |                                            | 6 January 2015   |                                               |
| 3       | AZT,ddI,LOP/r | 10                                         | 8 August 2006    |                                               |
| 4       | AZT,3TC,LOP/r | 4                                          | 18 February 2009 |                                               |
| 5       | ABC,3TC,LOP/r | 5                                          | 29 July 2008     |                                               |
| 6       | AZT,3TC,NVP   | 15                                         | 3 April 2007     | Y                                             |
|         | AZT,3TC,LOP/r |                                            | 3 May 2010       |                                               |
| 7       | ABC,3TC,LOP/r | 24                                         | 27 January 2009  |                                               |
| 8       | AZT,3TC,LOP/r | 5                                          | 19 February 2008 |                                               |
| 9       | AZT,3TC,LOP/r | 13                                         | 5 April 2010     |                                               |
| 10      | 3TC,ABC,LOP/r | 2                                          | 7 April 2008     | Y                                             |
|         | AZT,3TC,LOP/r |                                            | 11 May 2010      |                                               |
|         | AZT,3TC,EFV   |                                            | 18 May 2011      |                                               |
| 11      | AZT,3TC,LOP/r |                                            | 17 January 2012  |                                               |
| 12      | AZT,3TC,LOP/r | 5                                          | 23 January 2007  |                                               |
| 13      | AZT,ABC,3TC   | 26                                         | 11 July 2006     | Y                                             |
|         | 3TC,ABC,NVP   |                                            | 13 November 2007 |                                               |
|         | AZT,3TC,LOP/r |                                            | 17 June 2008     |                                               |
| 14      | AZT,3TC,LOP/r | 7                                          | 16 August 2005   |                                               |
|         | D4T,3TC,LOP/r |                                            | 19 January 2009  |                                               |
|         | AZT,3TC,LOP/r |                                            | 19 March 2014    |                                               |
| 15      | AZT,3TC,LOP/r | 3                                          | 29 January 2007  | Y                                             |
|         | AZT,3TC,NVP   |                                            | 23 March 2007    |                                               |
| 16      | AZT,ddI,LOP/r | 38                                         | 22 November 2010 |                                               |
|         | AZT,3TC,LOP/r |                                            | 26 November 2013 |                                               |
|         | AZT,ABC,LOP/r |                                            | 5 May 2014       |                                               |
| 17      | ABC,3TC,LOP/r | 7                                          | 25 November 2008 |                                               |
| 18      | AZT,3TC,LOP/r | 6                                          | 14 February 2006 | Y                                             |
|         | AZT,3TC,NVP   |                                            | 30 October 2007  |                                               |
|         | AZT,3TC,EFV   |                                            | 3 February 2009  |                                               |
| 19      | ABC,3TC,NVP   | 2                                          | 25 August 2009   | Y                                             |
|         | ABC,3TC,LOP/r |                                            | 16 March 2010    |                                               |
|         | ABC,3TC,NVP   |                                            | 7 April 2010     |                                               |
| 20      | AZT,ddI,NFV   | 1                                          | 10 March 2006    | Y                                             |
|         | AZT,ddI,LOP/r |                                            | 3 May 2008       |                                               |
|         | AZT,3TC,LOP/r |                                            | 22 June 2011     |                                               |
| 21      | AZT,3TC,LOP/r | 32                                         | 7 February 2012  |                                               |
| 22      | AZT,ddI,LOP/r | 14                                         | 3 February 2006  |                                               |
|         | AZT,3TC,LOP/r |                                            | 8 March 2013     |                                               |

| Patient | Regimen              | Age at First Treatment Initiation (months) | Start Date       | Switched to Second-Line Regimen? <sup>1</sup> |
|---------|----------------------|--------------------------------------------|------------------|-----------------------------------------------|
| 23      | AZT,ddI,LOP/r        | 8                                          | 20 December 2005 |                                               |
| 24      | AZT,3TC,LOP/r        | 75                                         | 9 December 2011  |                                               |
| 25      | AZT,3TC,LOP/r        | 57                                         | 7 February 2012  |                                               |
| 26      | AZT,3TC,NVP          | 14                                         | 2 October 2009   | Y                                             |
|         | AZT,ddI,LOP/r        |                                            | 1 February 2012  |                                               |
|         | AZT,3TC,LOP/r        |                                            | 23 May 2012      |                                               |
| 27      | ddI,D4T,LOP/r        | 11                                         | 9 June 2006      |                                               |
|         | ddI,AZT,LOP/r        |                                            | 19 October 2011  |                                               |
| 28      | AZT,3TC,LOP/r        | 4                                          | 11 October 2007  |                                               |
| 29      | AZT,3TC,LOP/r        | 25                                         | 15 July 2009     |                                               |
| 30      | AZT,3TC,NVP          | 19                                         | 22 December 2009 |                                               |
|         | ddI,3TC,NVP          |                                            | 29 January 2010  |                                               |
|         | AZT,3TC,NVP          |                                            | 23 December 2010 |                                               |
|         | AZT,3TC,EFV          |                                            | 1 July 2011      |                                               |
|         | AZT,3TC,NVP          |                                            | 4 July 2011      |                                               |
|         | AZT,3TC,LOP/r        |                                            | 2 September 2011 |                                               |
| 31      | AZT,3TC,LOP/r        | 63                                         | 2 May 2012       |                                               |
| 32      | AZT,3TC,LOP/r        | 8                                          | 31 October 2007  |                                               |
| 33      | AZT,3TC,LOP/r        | 5                                          | 22 July 2008     | Y                                             |
|         | AZT,3TC,EFV          |                                            | 17 July 2013     |                                               |
| 34      | D4T,3TC,LOP/r        | 11                                         | 26 July 2006     | Y                                             |
|         | 3TC, AZT,Darunavir/r |                                            | 7 January 2010   |                                               |
| 35      | AZT,3TC,LOP/r        | 7                                          | 19 December 2007 |                                               |
| 36      | AZT,3TC,LOP/r        | 8                                          | 1 November 2007  | Y                                             |
|         | AZT,3TC,NVP          |                                            | 22 February 2008 |                                               |
|         | 3TC,TDF,LOP/r        |                                            | 26 May 2009      |                                               |
| 37      | AZT,3TC,NVP          | 5                                          | 8 July 2010      | Y                                             |
|         | AZT,3TC,LOP/r        |                                            | 13 July 2011     |                                               |

1. 6 of 19 switches were for drug availability reasons and not defined as actual ARV switches to a second-line regimen based on the definition above.

**Table S5.** Clinical and laboratory details for five children with sustained virologic response.

| <b>S</b> | <b>Infection</b>      | <b>Age at ART</b> | <b>Type</b> | <b>No of</b> | <b>Median HIV VL at</b> | <b>VL after 6–11</b> | <b>ddPCR</b>  | <b>ddPCR</b>   | <b>WB at</b> |
|----------|-----------------------|-------------------|-------------|--------------|-------------------------|----------------------|---------------|----------------|--------------|
| <b>x</b> | <b>Intrapartum or</b> | <b>Initiation</b> | <b>of</b>   | <b>Regim</b> | <b>Time of ART</b>      | <b>months of</b>     | <b>at 6</b>   | <b>at 6–11</b> | <b>6–11</b>  |
|          | <b>in Utero?</b>      | <b>(months)</b>   | <b>ART</b>  | <b>ens</b>   | <b>Initiation</b>       | <b>ART</b>           | <b>months</b> | <b>years</b>   | <b>years</b> |
| F        | Intrapartum           | 9                 | PI          | 1            | 2900                    | <40                  | 15,363        | 109            | Pos          |
| F        | In utero              | 3                 | PI          | 1            | <40                     | <40                  | 3806          | 105            | Pos          |
| M        | In utero              | 23                | PI          | 1            | 60,807                  | <40                  | 14,166        | 242            | Ind          |
| M        | In utero              | 3                 | PI          | 2            | 315,681                 | <40                  | Missing       | 61             | Neg          |
| F        | Intrapartum           | 57                | PI          | 1            | 58,089                  | <40                  | 16,840        | 264            | Pos          |

F: Female, M: Male, PI: Protease Inhibitor, VL: Virus load, ART: Antiretroviral, ddPCR: digital drop PCR, WB: Western blot, Pos: Positive, Ind: Indeterminate, Neg: Negative.
